# Supplementary material
Source: publisher site journal article supplement (https://www.dovepress.com/article/368852)
Supplement: Supplementary file 1 [file get_supplementary_file.php]

**Supplementary materials**

**Supplementary figures**


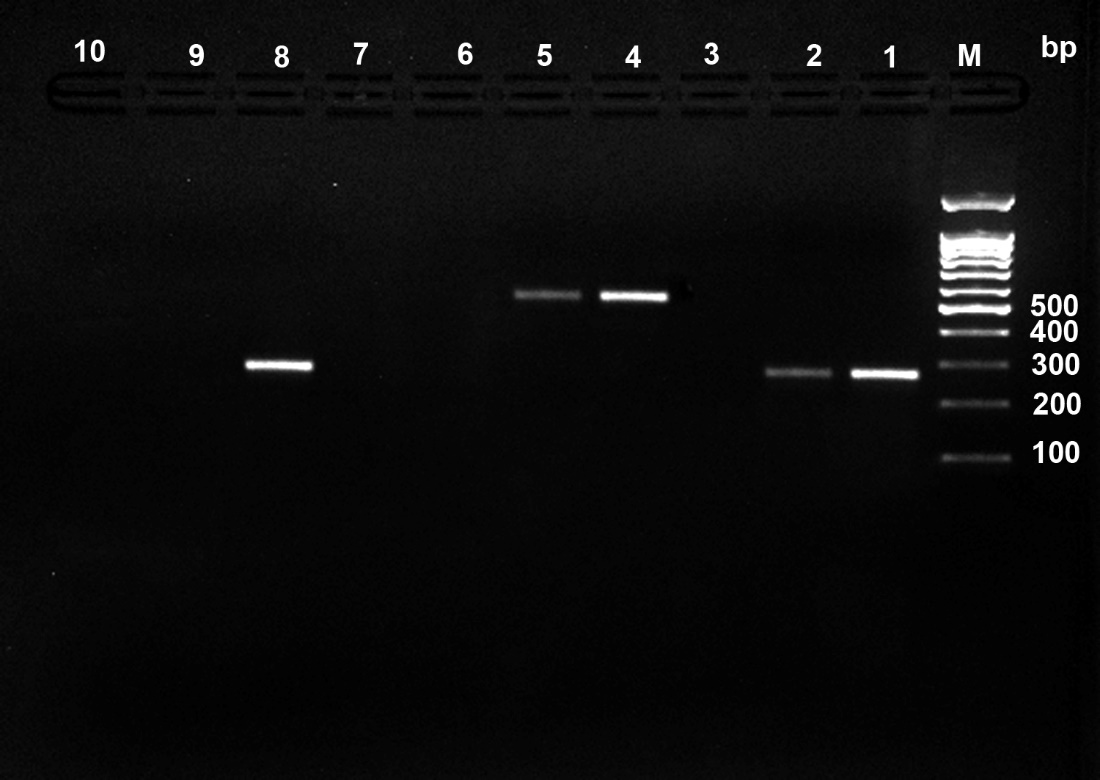


***can*=278bp**

***fnbB* = 523bp**

***fnbA*=269bp**

**Figure S1:** PCR results of adhesion virulence genes profiling of *S. aureus.* Agarose (1.5%) gel electrophoresis of *S. aureus* PCR products of adhesion virulence factor genes. M = 100 bp molecular weight marker; Lane 1 &2: *fnbA* (269 bp) positive samples; Lane 3: *fnbA* negative control; Lane 4 &5: *fnbB* (523 bp) positive samples; Lane 6; *fnbB* negative samples; Lane 7: *fnbB* negative control; lane 8: *can* (278 bp) positive samples; Lane 9: *can* negative sample and Lane 10: *can* negative control.

**
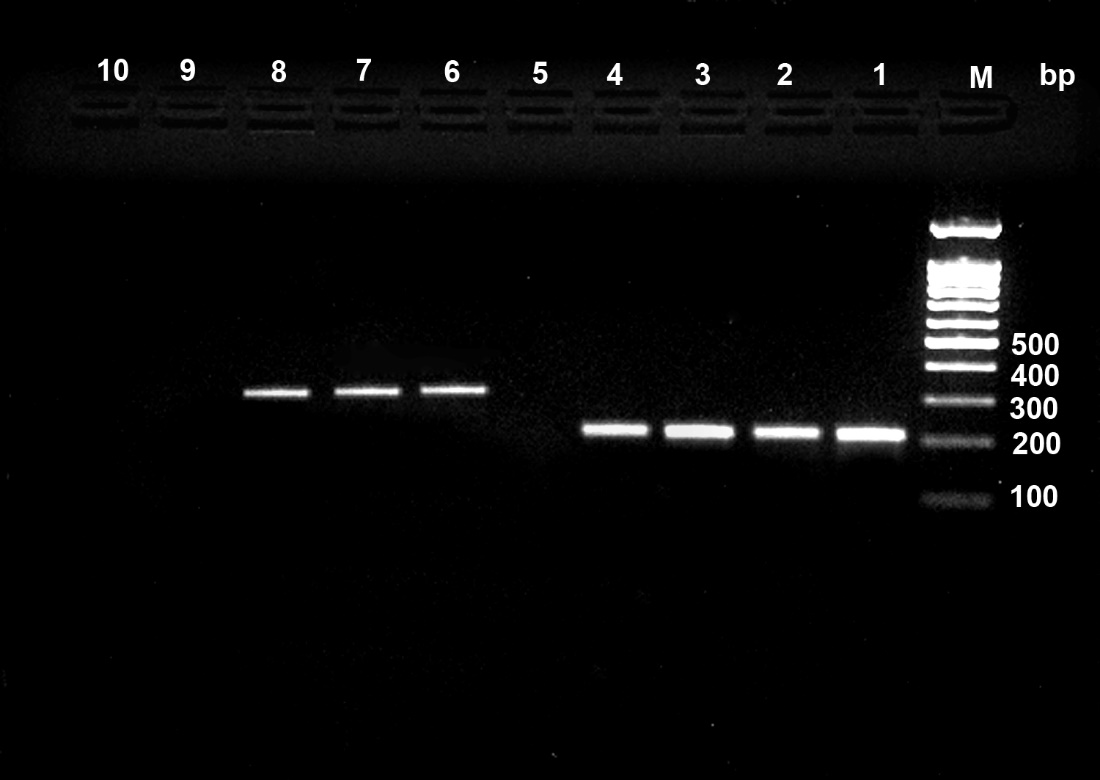
**

***hla*=210 bp**

***hlb*=310 bp**

**Figure S2:** PCR results of hemolysin virulence genes profiling of *S. aureus.* Agarose (1.5%) gel electrophoresis of *S. aureus* PCR products of hemolysines virulence factor genes. M = 100 bp molecular weight marker; Lane 1, 2, 3&4: *hla* (210 bp) positive samples; Lane 5: negative control for *hla* gene ; Lane 6,7&*8 hlb* (310 bp) positive samples ; Lane 9: *hlb* negative samples and Lane 10 negative control for *hlb* gene.


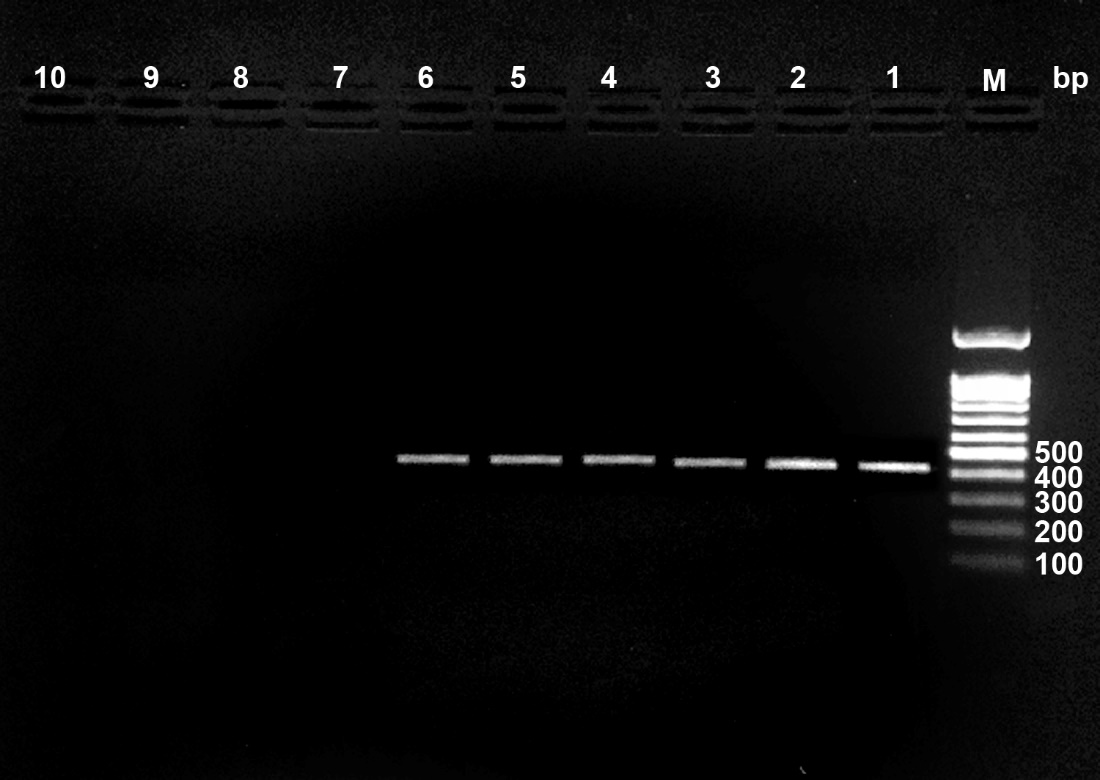


***pvl*=433 bp**

# **Figure S3:** PCR results of Panton-Valentine leukocidin virulence genes profiling of *S. aureus.* Agarose (1.5%) gel electrophoresis of *S. aureus* PCR products of *pvl* virulence factor gene. M = 100 bp molecular weight marker; Lane 1, 2, 3, 4, 5&6: *pvl* (433bp) positive samples; Lane 7, 8 & 9: *pvl* negative samples and Lane 10: negative control.

**
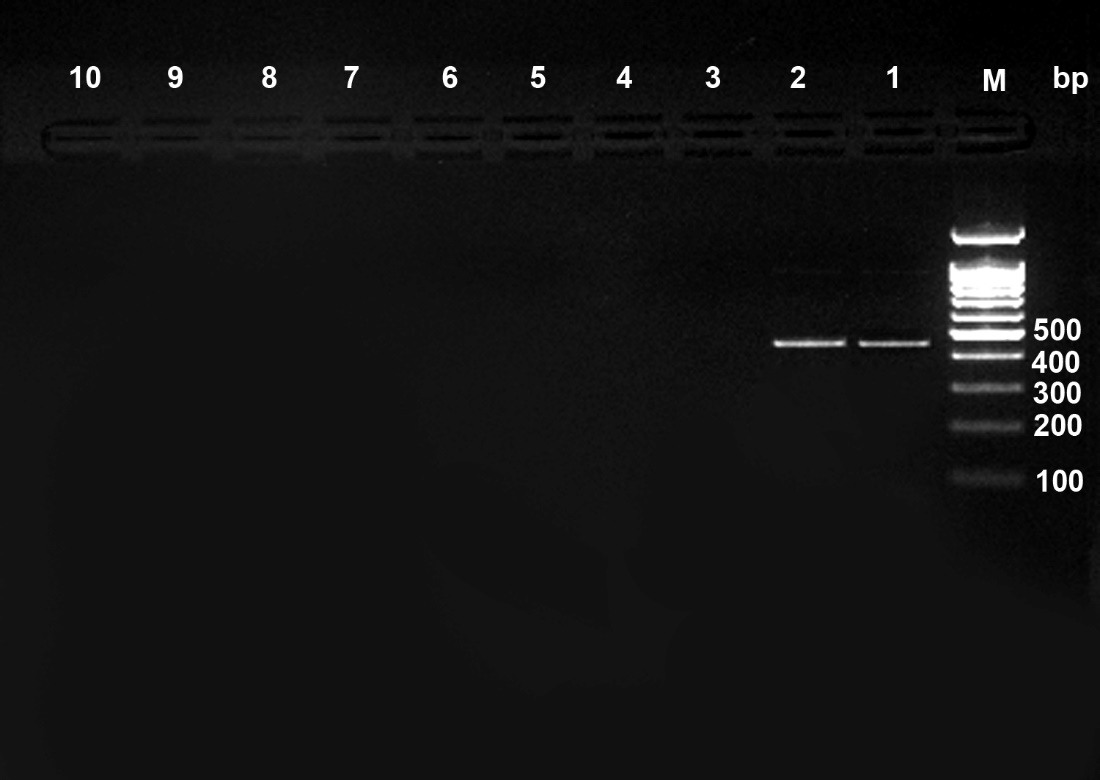
**

***seb*=477 bp**

# **Figure S4:** PCR results of enterotoxin virulence gene profiling of *S. aureus*. Agarose (1.5%) gel electrophoresis of *S. aureus* PCR products of *seb* virulence factor gene. M = 100 bp molecular weight marker; Lane 1& 2: *seb* (477 bp) positive samples; Lane 3, 4, 5, 6, 7, 8 & 9: *seb* negative samples and Lane 10: negative control.

**Figure S5:** Susceptibility patterns of *S. aureus* samples.

**Supplementary Tables**

**Table S1: The list of primers used during the study**

| **Target gene** | **Sequence** | **Annealing temperature** | **Product length** | **GenBank accession no.** |
| --- | --- | --- | --- | --- |
| *Pvl* | F:5’-ATCATTAGGTAAAATGTCTGGACATGATCCA-3’  R:5’-GCATCAACTGTATTGGATAGCAAAAGC-3’ | 55˚c | 433 | **AB006796** |
| *fnbA* | F:5’-TTAACTTGGGATAATGGTTTAGTTT-3’  R:5’-GCTGATGAATCCGTTTCTTCTATTG-3’ | 50˚c | 269 | [**LC073763.1**](https://www.ncbi.nlm.nih.gov/entrez/viewer.fcgi?db=nucleotide&id=1032528349) |
| *fnbB* | | F:5’-GTAACAGCTAATGGTCGAATTGATACT-3’ | | --- | | R:5’-CAAGTTCGATAGGAGTACTATGTTC-3’ | | 55˚c | 523 | [**X62992**](https://www.ncbi.nlm.nih.gov/nuccore/X62992)**.1** |
| *Can* | | F:5’- CGGGAGATATGCTACCAGAAGATA-3’ | | --- | | R:5’-ATAGCCTTGTGGAATTGTTACATCA-3’ | | 55˚c | 278 | [**M81736.1**](https://www.ncbi.nlm.nih.gov/entrez/viewer.fcgi?db=nucleotide&id=387879) |
| *Hla* | | F:5’- CTGATTACTATCCAAGAAATTCGATTG -3’ | | --- | | R:5’-CTTTCCAGCCTACTTTTTTATCAGT -3’ | | 55˚c | 210 | **KR063697.1** |
| *Hlb* | | F:5’-GTGCACTTACTGACAATAGTGC-3’ | | --- | | R:5’-GTTGATGAGTAGCTACCTTCAGT-3’ | | 60˚c | 310 | [**X13404.1**](https://www.ncbi.nlm.nih.gov/entrez/viewer.fcgi?db=nucleotide&id=46586) |
| *sea* | | F:5’-TTGGAAACGGTTAAAACGAA -3’ | | --- | | R:5’-GAACCTTCCCATCAAAAACA -3’ | | 55˚c | 121 | **M18970.1** |
| *seb* | | F:5’-TCGCATCAAACTGACAAACG -3’ | | --- | | R:5’-GCAGGTACTCTATAAGTGCC -3’ | | 55˚c | 477 | **M11118.1** |
| *sec* | | F:5’-GACATAAAAGCTAGGAATTT -3’ | | --- | | R:5’-AAATCGGATTAACATTATCC -3’ | | 55˚c | 257 | [**AB084256.1**](https://www.ncbi.nlm.nih.gov/entrez/viewer.fcgi?db=nucleotide&id=20278874) |

- **Abbreviations:**

***hla* = Hemolysine a; *hlb*= Hemolysine b; *seb* = staphylococcal enterotoxin b; *sea*= staphylococcal enterotoxin a; *sec*=staphylococcal enterotoxin c,; *pvl*= Pantone Valentine leucocidin; *can* = collagen binding protein ; *fnbA* = fibronectin binding proteins A ; *fnbB*= fibronectin binding proteins B.**
